# Supplementary material for: Optimized growth and electro-elastic properties of centimeter-sized piezoelectric crystals of Na2TeW2O9
Source: Royal Society of Chemistry journal article supplement (doi:10.1039/c6ce01101b), 2016-01-01

## Electronic Supplementary Information for:

### Optimized growth and electro-elastic properties of centimeter-sized piezoelectric crystals $\text{Na}_2\text{TeW}_2\text{O}_9$

Xiangxin Tian, Qian Wu, Peng Zhao, Youxuan Sun, Zeliang Gao\*, and Xutang  
Tao\*

State Key Laboratory of Crystal Materials, Shandong University, Jinan, 250100,  
China

E-mail: [txt@sdu.edu.cn](mailto:txt@sdu.edu.cn)

E-mail: [gaozeliang@sdu.edu.cn](mailto:gaozeliang@sdu.edu.cn)

**Fig. S1** Photographs of (a) the as-grown crystal using [010] oriented seed with molar ratio  $\text{NTW}:\text{TeO}_2 = 1:0.2$ , (b) the crystal using  $\perp(001)$  oriented seed with molar ratio  $\text{NTW}:\text{TeO}_2 = 1:0.4$ , and (c) the crystal using  $\perp(001)$  oriented seed with molar ratio  $\text{NTW}:\text{TeO}_2 = 1:0.18$ .

**Fig. S1** Photographs of (a) the as-grown crystal using [010] oriented seed with molar ratio  $\text{NTW}:\text{TeO}_2 = 1:0.2$ , (b) the crystal using  $\perp(001)$  oriented seed with molar ratio  $\text{NTW}:\text{TeO}_2 = 1:0.4$ , and (c) the crystal using  $\perp(001)$  oriented seed with molar ratio  $\text{NTW}:\text{TeO}_2 = 1:0.18$ .

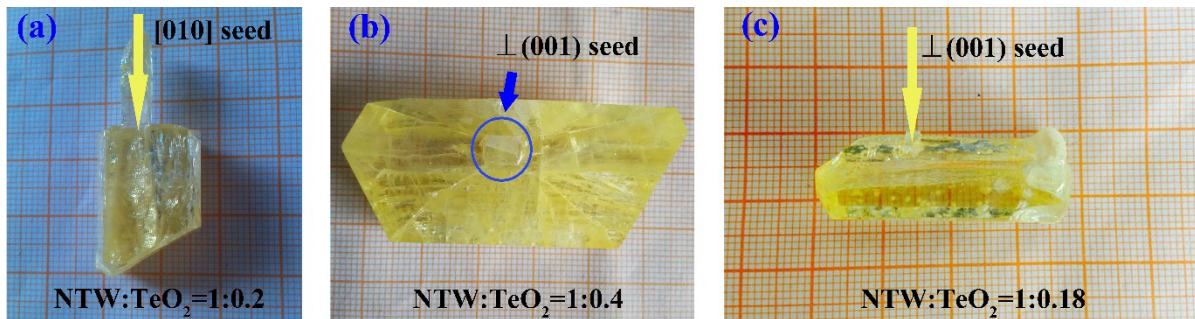

Supplement: c6ce01101b1.pdf [file c6ce01101b1.pdf]
